# Supplementary material
Source: ML conference proceedings conference paper supplement (https://openaccess.thecvf.com/content/CVPR_2019/html/Dong_Evading_Defenses_to_CVPR_2019_paper.html)
Supplement: Supplementary file 1 [file Dong_Evading_Defenses_to_CVPR_2019_supplemental.pdf]

# Supplementary Material for: Evading Defenses to Transferable Adversarial Examples by Translation-Invariant Attacks

Yinpeng Dong, Tianyu Pang, Hang Su, Jun Zhu\*

Dept. of Comp. Sci. and Tech., BNRist Center, State Key Lab for Intell. Tech. & Sys.,  
Institute for AI, THBI Lab, Tsinghua University, Beijing, 100084, China

{dyp17, pty17}@mails.tsinghua.edu.cn, {suhangss, dcszj}@mail.tsinghua.edu.cn

We first show the results of the proposed translation-invariant attack method for white-box attacks and black-box attacks against normally trained models. We adopt the same settings for attacks. We also generate adversarial examples for Inception v3 (Inc-v3) [5], Inception v4 (Inc-v4), Inception ResNet v2 (IncRes-v2) [4], and ResNet v2-152 (Res-v2-152) [2], respectively, using FGSM, TI-FGSM, MI-FGSM, TI-MI-FGSM, DIM, and TI-DIM. For the translation-invariant based attacks, we use the  $7 \times 7$  Gaussian kernel, since that the normally trained models have similar discriminative regions. We then use these adversarial examples to attack six normally trained models—Inc-v3, Inc-v4, IncRes-v2, Res-v2-152, VGG-16 [3], and Res-v1-152 [1]. The results are shown in Table 6 for FGSM and TI-FGSM, Table 7 for MI-FGSM and TI-MI-FGSM, and Table 8 for DIM and TI-DIM. The translation-invariant based attacks get better results in most cases than the baseline attacks.

Moreover, the experiments above and in the main paper are conducted based on the  $L_\infty$  norm bound. We further demonstrate the applicability of the proposed method for other norm bounds, especially the  $L_2$  norm bound. Similar to the results in Table 2-5, we present the results of FGSM and TI-FGSM in Table 9, MI-FGSM and TI-MI-FGSM in Table 10, DIM and TI-DIM in Table 11, and the ensemble method in Table 12. All those results are based on the  $L_2$  norm bound, and we set the maximum perturbation  $\epsilon = 10 \cdot \sqrt{d}$ , where  $d$  is the dimension of input images. The results based on the  $L_2$  norm bound also show the effectiveness of the proposed method.

## References

- [1] Kaiming He, Xiangyu Zhang, Shaoqing Ren, and Jian Sun. Deep residual learning for image recognition. In *CVPR*, 2016. 1
- [2] Kaiming He, Xiangyu Zhang, Shaoqing Ren, and Jian Sun. Identity mappings in deep residual networks. In *ECCV*, 2016. 1
- [3] Karen Simonyan and Andrew Zisserman. Very deep convolutional networks for large-scale image recognition. In *ICLR*, 2015. 1
- [4] Christian Szegedy, Sergey Ioffe, Vincent Vanhoucke, and Alexander A Alemi. Inception-v4, inception-resnet and the impact of residual connections on learning. In *AAAI*, 2017. 1
- [5] Christian Szegedy, Vincent Vanhoucke, Sergey Ioffe, Jon Shlens, and Zbigniew Wojna. Rethinking the inception architecture for computer vision. In *CVPR*, 2016. 1

---

\*Corresponding author.

|            | Attack  | Inc-v3       | Inc-v4       | IncRes-v2    | Res-v2-152   | VGG-16      | Res-v1-152  |
|------------|---------|--------------|--------------|--------------|--------------|-------------|-------------|
| Inc-v3     | FGSM    | <b>79.6*</b> | 35.9         | 30.6         | 30.2         | 49.7        | 36.3        |
|            | TI-FGSM | 75.4*        | <b>37.3</b>  | <b>32.1</b>  | <b>34.1</b>  | <b>62.0</b> | <b>44.9</b> |
| Inc-v4     | FGSM    | 43.1         | <b>72.6*</b> | 32.5         | 34.3         | 50.7        | 37.7        |
|            | TI-FGSM | <b>45.3</b>  | 68.1*        | <b>33.7</b>  | <b>35.4</b>  | <b>63.3</b> | <b>46.2</b> |
| IncRes-v2  | FGSM    | 44.3         | 36.1         | <b>64.3*</b> | 31.9         | 49.4        | 38.6        |
|            | TI-FGSM | <b>49.7</b>  | <b>41.5</b>  | 63.7*        | <b>40.1</b>  | <b>64.2</b> | <b>46.7</b> |
| Res-v2-152 | FGSM    | 40.1         | 34.0         | 30.3         | <b>81.3*</b> | 50.5        | 40.8        |
|            | TI-FGSM | <b>46.4</b>  | <b>39.3</b>  | <b>33.4</b>  | 78.9*        | <b>64.7</b> | <b>50.4</b> |

Table 6. The success rates (%) of adversarial attacks against six normally trained models—Inc-v3, Inc-v4, IncRes-v2, Res-v2-152, VGG-16, and Res-v1-152. The adversarial examples are crafted for Inc-v3, Inc-v4, IncRes-v2, and Res-v2-152, respectively, using FGSM and TI-FGSM. \* indicates the white-box attacks.

|            | Attack     | Inc-v3       | Inc-v4       | IncRes-v2     | Res-v2-152   | VGG-16      | Res-v1-152  |
|------------|------------|--------------|--------------|---------------|--------------|-------------|-------------|
| Inc-v3     | MI-FGSM    | 97.8*        | 47.1         | 46.4          | 38.7         | 50.3        | 38.1        |
|            | TI-MI-FGSM | <b>97.9*</b> | <b>52.4</b>  | <b>47.9</b>   | <b>41.1</b>  | <b>63.4</b> | <b>48.1</b> |
| Inc-v4     | MI-FGSM    | 67.1         | <b>98.8*</b> | 54.3          | 47.0         | 58.5        | 43.2        |
|            | TI-MI-FGSM | <b>68.6</b>  | <b>98.8*</b> | <b>55.3</b>   | <b>47.7</b>  | <b>69.0</b> | <b>51.3</b> |
| IncRes-v2  | MI-FGSM    | 74.8         | 64.8         | <b>100.0*</b> | 54.5         | 59.3        | 50.8        |
|            | TI-MI-FGSM | <b>76.1</b>  | <b>69.5</b>  | <b>100.0*</b> | <b>59.6</b>  | <b>74.4</b> | <b>61.5</b> |
| Res-v2-152 | MI-FGSM    | 54.2         | 48.1         | 44.3          | <b>97.5*</b> | 52.6        | 48.7        |
|            | TI-MI-FGSM | <b>55.6</b>  | <b>50.9</b>  | <b>45.1</b>   | 97.4*        | <b>65.6</b> | <b>59.6</b> |

Table 7. The success rates (%) of adversarial attacks against six normally trained models—Inc-v3, Inc-v4, IncRes-v2, Res-v2-152, VGG-16, and Res-v1-152. The adversarial examples are crafted for Inc-v3, Inc-v4, IncRes-v2, and Res-v2-152, respectively, using MI-FGSM and TI-MI-FGSM. \* indicates the white-box attacks.

|            | Attack | Inc-v3       | Inc-v4       | IncRes-v2    | Res-v2-152   | VGG-16      | Res-v1-152  |
|------------|--------|--------------|--------------|--------------|--------------|-------------|-------------|
| Inc-v3     | DIM    | 98.3*        | 73.8         | 67.8         | 58.4         | 62.5        | 49.3        |
|            | TI-DIM | <b>98.5*</b> | <b>75.2</b>  | <b>69.2</b>  | <b>59.0</b>  | <b>74.3</b> | <b>59.1</b> |
| Inc-v4     | DIM    | <b>81.8</b>  | 98.2*        | <b>74.2</b>  | <b>65.1</b>  | 65.5        | 51.4        |
|            | TI-DIM | 80.7         | <b>98.7*</b> | 73.2         | 62.7         | <b>77.4</b> | <b>59.8</b> |
| IncRes-v2  | DIM    | 86.1         | 83.5         | <b>99.1*</b> | 73.5         | 67.9        | 62.7        |
|            | TI-DIM | <b>86.4</b>  | <b>85.5</b>  | 98.8*        | <b>76.3</b>  | <b>79.3</b> | <b>72.2</b> |
| Res-v2-152 | DIM    | <b>77.0</b>  | <b>77.8</b>  | <b>73.5</b>  | <b>97.4*</b> | 67.4        | 67.8        |
|            | TI-DIM | <b>77.0</b>  | 73.9         | 73.2         | 97.2*        | <b>78.4</b> | <b>77.8</b> |

Table 8. The success rates (%) of adversarial attacks against six normally trained models—Inc-v3, Inc-v4, IncRes-v2, Res-v2-152, VGG-16, and Res-v1-152. The adversarial examples are crafted for Inc-v3, Inc-v4, IncRes-v2, and Res-v2-152, respectively, using DIM and TI-DIM. \* indicates the white-box attacks.

|            | Attack  | Inc-v3 <sub>ens3</sub> | Inc-v3 <sub>ens4</sub> | IncRes-v2 <sub>ens</sub> | HGD         | R&P         | JPEG        | TVM         | NIPS-r3     |
|------------|---------|------------------------|------------------------|--------------------------|-------------|-------------|-------------|-------------|-------------|
| Inc-v3     | FGSM    | 13.7                   | 14.5                   | 6.8                      | 6.0         | 6.1         | 10.9        | 22.0        | 8.2         |
|            | TI-FGSM | <b>15.2</b>            | <b>15.7</b>            | <b>10.2</b>              | <b>8.2</b>  | <b>18.8</b> | <b>11.0</b> | <b>25.7</b> | <b>10.4</b> |
| Inc-v4     | FGSM    | <b>13.9</b>            | 15.0                   | 8.2                      | <b>8.3</b>  | 7.4         | <b>11.5</b> | 22.2        | 8.5         |
|            | TI-FGSM | <b>13.9</b>            | <b>16.2</b>            | <b>10.4</b>              | 8.0         | <b>9.1</b>  | 11.3        | <b>24.3</b> | <b>8.9</b>  |
| IncRes-v2  | FGSM    | 16.0                   | 17.5                   | 11.3                     | 10.8        | 10.2        | 14.4        | 26.2        | 11.6        |
|            | TI-FGSM | <b>18.1</b>            | <b>18.5</b>            | <b>15.5</b>              | <b>12.3</b> | <b>13.2</b> | <b>14.7</b> | <b>29.4</b> | <b>13.6</b> |
| Res-v2-152 | FGSM    | 12.7                   | 15.1                   | 8.1                      | 7.0         | 7.1         | 10.2        | 20.3        | 8.2         |
|            | TI-FGSM | <b>13.4</b>            | <b>15.8</b>            | <b>9.7</b>               | <b>7.2</b>  | <b>7.9</b>  | <b>10.7</b> | <b>22.5</b> | <b>9.1</b>  |

Table 9. The success rates (%) of black-box attacks against eight defenses based on the  $L_2$  norm bound. The adversarial examples are crafted for Inc-v3, Inc-v4, IncRes-v2, and Res-v2-152 respectively using FGSM and TI-FGSM.

|            | Attack     | Inc-v3 <sub>ens3</sub> | Inc-v3 <sub>ens4</sub> | IncRes-v2 <sub>ens</sub> | HGD         | R&P         | JPEG        | TVM         | NIPS-r3     |
|------------|------------|------------------------|------------------------|--------------------------|-------------|-------------|-------------|-------------|-------------|
| Inc-v3     | MI-FGSM    | 15.9                   | 16.3                   | 7.0                      | 7.8         | 7.5         | 12.8        | 15.7        | 8.4         |
|            | TI-MI-FGSM | <b>22.8</b>            | <b>24.6</b>            | <b>14.8</b>              | <b>14.0</b> | <b>13.0</b> | <b>15.8</b> | <b>22.7</b> | <b>15.1</b> |
| Inc-v4     | MI-FGSM    | 18.1                   | 18.7                   | 8.3                      | 9.3         | 9.0         | 14.9        | 17.5        | 10.7        |
|            | TI-MI-FGSM | <b>24.3</b>            | <b>25.5</b>            | <b>27.9</b>              | <b>15.7</b> | <b>15.9</b> | <b>29.0</b> | <b>25.2</b> | <b>16.5</b> |
| IncRes-v2  | MI-FGSM    | 22.9                   | 21.6                   | 16.6                     | 17.1        | 15.2        | 22.2        | 20.9        | 18.0        |
|            | TI-MI-FGSM | <b>35.0</b>            | <b>35.8</b>            | <b>30.5</b>              | <b>26.3</b> | <b>26.4</b> | <b>29.8</b> | <b>35.6</b> | <b>28.8</b> |
| Res-v2-152 | MI-FGSM    | 18.6                   | 18.7                   | 10.4                     | 12.4        | 10.8        | 14.9        | 15.9        | 11.1        |
|            | TI-MI-FGSM | <b>21.6</b>            | <b>23.3</b>            | <b>17.3</b>              | <b>15.1</b> | <b>15.6</b> | <b>18.7</b> | <b>24.6</b> | <b>17.6</b> |

Table 10. The success rates (%) of black-box attacks against eight defenses based on the  $L_2$  norm bound. The adversarial examples are crafted for Inc-v3, Inc-v4, IncRes-v2, and Res-v2-152 respectively using MI-FGSM and TI-MI-FGSM.

|            | Attack | Inc-v3 <sub>ens3</sub> | Inc-v3 <sub>ens4</sub> | IncRes-v2 <sub>ens</sub> | HGD         | R&P         | JPEG        | TVM         | NIPS-r3     |
|------------|--------|------------------------|------------------------|--------------------------|-------------|-------------|-------------|-------------|-------------|
| Inc-v3     | DIM    | 17.9                   | 21.8                   | 9.7                      | 11.8        | 10.0        | 15.5        | 17.0        | 12.7        |
|            | TI-DIM | <b>29.6</b>            | <b>31.9</b>            | <b>22.0</b>              | <b>20.1</b> | <b>20.0</b> | <b>22.0</b> | <b>27.3</b> | <b>23.9</b> |
| Inc-v4     | DIM    | 21.6                   | 22.2                   | 12.9                     | 15.8        | 13.3        | 20.5        | 19.2        | 16.6        |
|            | TI-DIM | <b>31.0</b>            | <b>33.1</b>            | <b>24.0</b>              | <b>22.8</b> | <b>22.9</b> | <b>24.8</b> | <b>29.2</b> | <b>25.1</b> |
| IncRes-v2  | DIM    | 34.5                   | 31.0                   | 23.8                     | 27.0        | 25.8        | 31.5        | 25.0        | 26.9        |
|            | TI-DIM | <b>43.3</b>            | <b>45.2</b>            | <b>42.4</b>              | <b>39.3</b> | <b>42.7</b> | <b>42.2</b> | <b>43.3</b> | <b>41.2</b> |
| Res-v2-152 | DIM    | 29.0                   | 30.1                   | 18.7                     | 27.8        | 19.8        | 26.7        | 21.3        | 23.1        |
|            | TI-DIM | <b>36.3</b>            | <b>37.2</b>            | <b>28.9</b>              | <b>28.0</b> | <b>30.0</b> | <b>28.4</b> | <b>36.1</b> | <b>32.7</b> |

Table 11. The success rates (%) of black-box attacks against eight defenses based on the  $L_2$  norm bound. The adversarial examples are crafted for Inc-v3, Inc-v4, IncRes-v2, and Res-v2-152 respectively using DIM and TI-DIM.

| Attack     | Inc-v3 <sub>ens3</sub> | Inc-v3 <sub>ens4</sub> | IncRes-v2 <sub>ens</sub> | HGD         | R&P         | JPEG        | TVM         | NIPS-r3     |
|------------|------------------------|------------------------|--------------------------|-------------|-------------|-------------|-------------|-------------|
| FGSM       | <b>26.6</b>            | <b>27.3</b>            | 16.0                     | <b>18.1</b> | 16.5        | <b>21.1</b> | 23.7        | 17.9        |
| TI-FGSM    | 26.1                   | 26.7                   | <b>19.2</b>              | 17.1        | <b>19.1</b> | 20.0        | <b>27.2</b> | <b>19.1</b> |
| MI-FGSM    | 44.3                   | 42.8                   | 27.2                     | 40.7        | 28.1        | 43.6        | 30.8        | 34.4        |
| TI-MI-FGSM | <b>59.3</b>            | <b>59.0</b>            | <b>53.0</b>              | <b>54.6</b> | <b>50.0</b> | <b>53.3</b> | <b>51.3</b> | <b>51.1</b> |
| DIM        | 57.0                   | 54.7                   | 37.4                     | 58.9        | 43.4        | <b>60.3</b> | 37.3        | 50.3        |
| TI-DIM     | <b>66.9</b>            | <b>66.0</b>            | <b>60.4</b>              | <b>63.2</b> | <b>62.9</b> | 58.4        | <b>58.4</b> | <b>62.7</b> |

Table 12. The success rates (%) of black-box attacks against eight defenses based on the  $L_2$  norm bound. The adversarial examples are crafted for the ensemble of Inc-v3, Inc-v4, IncRes-v2, and Res-v2-152 using FGSM, TI-FGSM, MI-FGSM, TI-MI-FGSM, DIM, and TI-DIM.
